# Supplementary material for: Cryo-EM structural observation on the interaction of the bacterial energy-coupling factor transporter with perfluoroalkyl substances
Source: Research Square preprint supplement (doi:10.21203/rs.3.rs-8140096/v1), 2025-12-03
Supplement: Supplementary file 1 [file 8882b106bf6d43d9e9fab75a.docx]

**Supplementary Information for**

**Cryo-EM structural observation on the interaction of the bacterial energy-coupling factor transporter with perfluoroalkyl substances**

Zeming Wang1,#, Hui Li2,#, Chao Qin1,#, Yanzheng Gao1,*, James M. Tiedje2

1Institute of Organic Contaminant Control and Soil Remediation, College of Resources and Environmental Sciences, Nanjing Agricultural University, Nanjing, Jiangsu 210095, China

2Department of Plant, Soil and Microbial Sciences, Michigan State University, East Lansing, Michigan, 48824, USA

***Corresponding author**: Yanzheng Gao, Address: Weigang Road 1, Nanjing 210095, China. E-mail: gaoyanzheng@njau.edu.cn

#Z.W., H.L. and C.Q. contributed equally to this work.

**Supplementary Table 1.** Energy decomposition analysis of the interactions between PFOS and ECF-FolT2.

| **Object** | **Interaction energies of PFOS to ECF-FolT2 (kcal/mol)** |
| --- | --- |
| Total interaction energy (Δ*E*int) | -32.67 |
| Electrostatic energy (Δ*E*els) | -24.65 |
| Exchange (Δ*E*x) | -12.71 |
| Pauli repulsion (Δ*E*rep) | 70.17 |
| Exchange repulsion (Δ*E*xrep = Δ*E*x + Δ*E*rep) | 57.47 |
| Orbital (Δ*E*orb) | -13.27 |
| DFT correlation (Δ*E*DFTc) | -23.25 |
| Dispersion correction (Δ*E*dc) | -28.98 |
| Coulomb correlation (Δ*E*C =Δ*E*DFTc + Δ*E*dc) | -52.22 |

**Supplementary Table 2.** Primer Sequence Information of the construction of pETDuet-1-EcfA-EcfA’ and pRSFDuet-1EcfT-FolT2.

| **Primer** | **Primer sequence** | **Restriction site** |
| --- | --- | --- |
| EcfA-for | aaaaaccatggatggcaatcgctttcgaaca | NcoI |
| EcfA-rev | aaaaaaagcttctaccaatgacgaaaaatta | BamHI |
| EcfA’-for | aaaaacatatgatgacagaaaatatcattag | NdeI |
| EcfA’-rev | aaaaactcgagaatcgctttcgaacacgtaa | Xhol |
| EcfT-for | aaaaaggatccatgtctaattttatctttgg | BamHI |
| EcfT-rev | aaaaaaagcttctaccaatgacgaaaaatta | HindIII |
| FolT2-for | aaaaacatatg atgtttgccattgtcttcaa | NdeI |
| FolT2-rev | aaaaactcgagttatttattcaaacgggctt | XhoI |
